# Supplementary material
Source: ML conference proceedings conference paper supplement (https://openreview.net/forum?id=ctAeamWgUe)
Supplement: supplementary_material [file List_of_attacks_Final.xlsx]

## Sheet: Sheet1
Attack #	Start Time	End Time	Attack Point	Start State	Attack	Actual Change	Expected Impact or attacker intent	Unexpected Outcome
0	2015-12-28 11:22:00	11:28:22	LIT-101	Water level between L and H	Increase by 1 mm every second	No	Tank Underflow; Damage P-101
1	2015-12-28 12:00:55	12:04:10	AIT-202	Value of AIT-202 is >7.05	Set value of AIT-202 as 6	No	P-203 turns off; Change in water quality	Impact seen on AIT-504 after two hours at around 14:15. It increased above HH but Drainage did not start
2	2015-12-28 12:08:25	12:15:33	LIT-301	Water level between L and H	Water level increased above HH	No	Stop of inflow; Tank underflow; Damage P-301
3	2015-12-28 13:10:10	13:26:13	DPIT-301	Value of DPIT is <40kpa	Set value of DPIT as >40kpa	No	Backwash process is started again and again; Normal operation stops; Decrease in water level of tank 401. Increase in water level of tank 301
4	2015-12-28 14:16:20	14:19:00	FIT-401	Value of FIT-401 above 1	Set value of FIT-401 as <0.7	No	UV shutdown; P-501 turns off;	UV did not shutdown; P-501 did not turn off
5	2015-12-28 14:19:00	14:28:20	FIT-401	Value of FIT-401 above 1	Set value of FIT-401 as 0	No	UV shutdown; P-501 turns off;
6	2015-12-29 11:57:25	12:02:00	LIT-301	Water level between L and H	Decrease water level by 1mm each second	No	Tank Overflow
7	2015-12-29 18:10:43	18:15:01	AIT-504	Value of AIT-504 <15 uS/cm	Set value of AIT-504 to 16 uS/cm	No	RO shut down sequence starts after 30 minutes. Water should go to drain.	RO did not shutdown; Water did not go to drain
8	2015-12-29 18:15:43	18:22:17	AIT-504	Value of AIT-504 <15 uS/cm	Set value of AIT-504 to 255 uS/cm	No	RO shut down sequence starts after 30 minutes. Water should go to drain.	RO did not shutdown; Water did not go to drain
9	2015-12-29 18:30:00	18:42:00	LIT-101	MV-101 is open; LIT-101 between L and H	Keep MV-101 on countinuosly; Value of LIT-101 set as 700 mm	Yes	Tank overflow
10	2015-12-29 22:55:18	23:03:00	AIT-502, P-501	UV-01 is on; AIT-502 is <150; P-501 is open	Stop UV-401; Value of AIT502 set as 150; Force P-501 to remain on	Yes	Possible damage to RO	P501 could not be kept on; Reduced output at FIT-502
11	2015-12-30 01:42:34	01:54:10	DPIT-301	DPIT-301 is <0.4 bar; MV-302 is on; P-602 is closed	Value of DPIT-301 set to >0.4 bar; Keep MV-302 open; Keep P-602 closed	Yes	System freeze
12	2015-12-30 10:01:50	10:12:01	LIT-401	Value of LIT-401 <1000; P-402 is on	Set value of LIT-401 as 1000; P402 is kept on	Yes	Tank underflow
13	2015-12-30 17:04:56	17:29:00	LIT-301	P-101 is off; P-102 is on; LIT-301 is between L and H	P-101 is turned on continuosly; Set value of LIT-301 as 801 mm	Yes	Tank 101 underflow; Tank 301 overflow
14	2015-12-31 01:17:08	01:45:18	LIT-401	P302 is on, LIT401 Is between L and H	Keep P-302 on contineoulsy; Value of LIT401 set as 600 mm till 1:26:01	Yes	Tank overflow
15	2015-12-31 15:47:40	16:07:10	LIT-101	P-101 is off; MV-101 is off; MV-201 is off; LIT-101 is between L and H; LIT-301 is between L and H	Turn P-101 on continuously; Turn MV-101 on continuously; Set value of LIT-101 as 700 mm; P-102 started itself because LIT301 level became low	Yes	Tank 101 underflow; Tank 301 overflow
16	2015-12-31 22:05:34	22:11:40	LIT-401	Water level between L and H	Set LIT-401 to less than L	No	Tank overflow
17	2016-01-01 10:36:00	10:46:00	LIT-301	Water level between L and H	Set LIT-301 to above HH	No	Tank underflow; Damage P-302
18	2016-01-01 14:21:12	14:28:35	LIT-101	Water level between L and H	Set LIT-101 to above H	No	Tank underflow; Damage P-101
19	2016-01-01 22:16:01	22:25:00	LIT-101	Water level between L and H	Set LIT-101 to less than LL	No	Tank overflow
20	2015-01-02 11:18:36	11:24:50	FIT-502	P-501 is on; FIT-502 in normal range	Close P-501; Set value of FIT-502 to 1.29 at 11:18:36	No	Reduced output	P-501 did not turn off; FIT-502 decreased to 0.8; Speed of P-501 increased to 28.50 Hz from 10 Hz during attack.
21	2015-01-02 11:31:38	11:36:18	AIT-402, AIT-502	In Normal Range	Set value of AIT402 as 260; Set value of AIT502 to 260	No	Water goes to drain because of overdosing	Water did not go to the drain
22	2015-01-02 11:43:48	11:50:28	FIT-401, AIT-502	In Normal Range	Set value of FIT-401 as 0.5; Set value of AIT-502 as 140 mV	No	UV will shut down and water will go to RO	UV did not shutdown
23	2015-01-02 11:51:42	11:56:38	FIT-401	In Normal Range	Set value of FIT-401 as 0	No	UV will shut down and water will go to RO	P-402 did not close, both should be interlinked
24	2015-01-02 13:13:02	13:40:56	LIT-301	Water level between L and H	decrease value by 0.5 mm per second	No	Tank overflow	Rate of decrease in water level reduced after 1:33:25 PM
	Single Stage Single Point Attacks
	Single Stage Multi Point Attacks
	Multi Stage Single Point Attacks
	Multi Stage Multi Point Attacks
We changed the value to constant in 26. ICS2 stopped showing the value because it was not changing. When we stopped the attack, it interpolated the points in between. It should have shown a steep increase in level. They will not detect attacks where value is constant
